# Supplementary material
Source: PubMed Central journal article supplement (PMC3951265)
Supplement: NIHMS555754-supplement-01.pdf [file NIHMS555754-supplement-01.pdf]

## Supplementary Materials for

### Epigenetic Activation of AP-1 Promotes Squamous Cell Carcinoma Metastasis

Xiangming Ding,<sup>1, \*</sup> Hongya Pan,<sup>1,5, \*</sup> Jiong Li,<sup>1</sup> Qi Zhong,<sup>1,6</sup> Xiaohong Chen,<sup>1,6</sup> Sarah M. Dry,<sup>3,7</sup> and Cun-Yu Wang<sup>1,2,3,4,†</sup>

This file includes:

**Fig. S1.** KDM4A is required for the abundance of JUN and FOSL1 induced by HGF.

**Fig. S2.** KDM4A, but not KDM4C, is required for the abundance of JUN and FOSL1 induced by HGF.

**Fig. S3.** KDM4A knockdown does not cause global changes of H3K9me3 and H3K36me3

**Fig. S4.** JUN and KDM4A co-occupy on the promoters of *FOSL1* and *JUN* in SCC23/MET cells.

**Fig. S5.** Over-expression of JUN cannot restore the abundance of FOSL1 in KDM4A-depleted cells.

**Fig. S6.** Inefficient KDM4A knockdown might be responsible for lymph node metastasis from KDM4A-depleted SCC23/MET cells.

**Table S1.** A list of genes that were repressed by KDM4A knockdown

**Table S2.** A list of genes that were more abundantly expressed by KDM4A knockdown

**Table S3.** Real-time RT-PCR primers for human histone demethylases

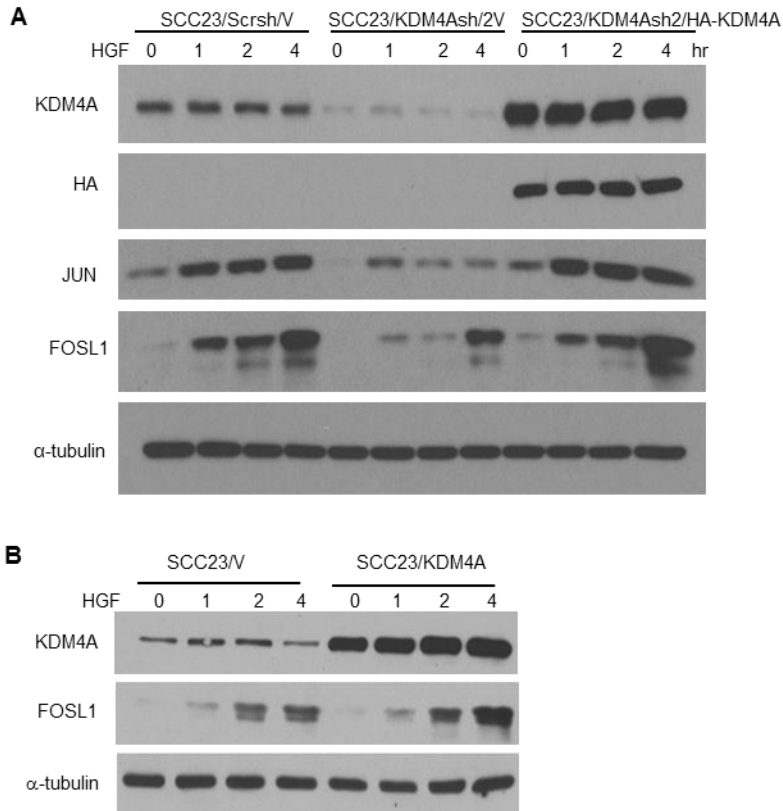

**Fig. S1. KDM4A is required for the abundance of JUN an FOSL1 induced by HGF. (A)**

Western blot analysis of the abundance of JUN an FOSL1 induced by HGF in SCC23 control (SCC23/Scrsh/V), KDM4A-depleted (SCC23/KDM4Ash/V) and KDM4A-restored (SCC23/KDM4Ash/HA-KDM4A) cells. (B) Western blot analysis of the abundance of FOSL1

in cells overexpressing KDM4A (SCC23/KDM4A) compared with control cells (SCC23/V).

Data are representative of 2 experiments.

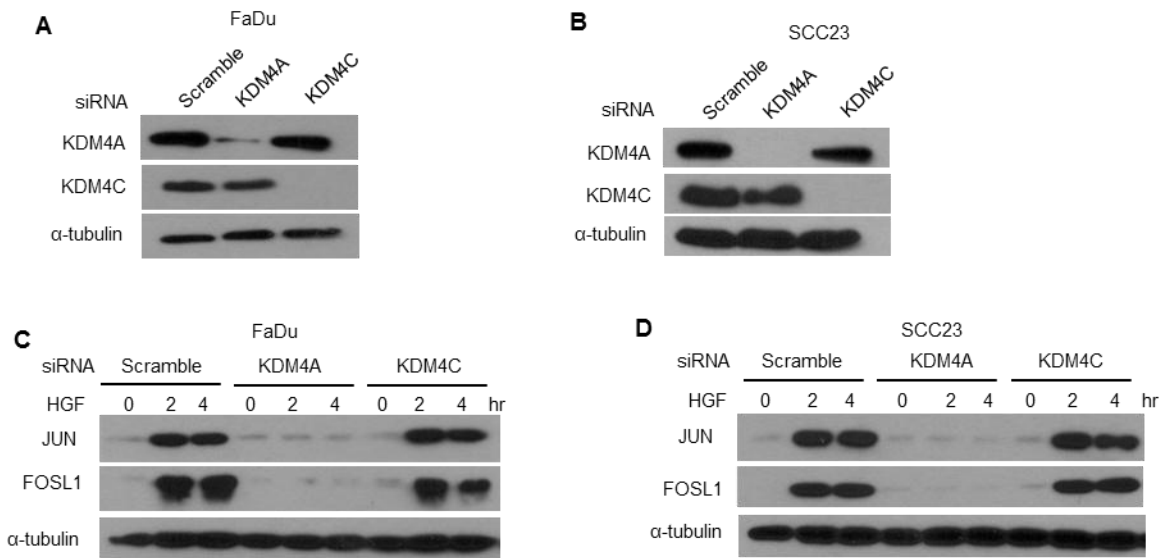

**Fig. S2. KDM4A, but not KDM4C, is required for the abundance of JUN and FOSL1 induced by HGF.** (A and B) Western blot analysis showing KDM4A and KDM4C knockdown by siRNA in (A) FaDu cells or (B) SCC23 cells. (C and D) Western blot analysis of the abundance of JUN and FOSL1 induced by 20 ng/ml of HGF in KDM4A- or KDM4C-depleted FaDu (C) or SCC23 cells (D). Data are representative of 2 experiments.

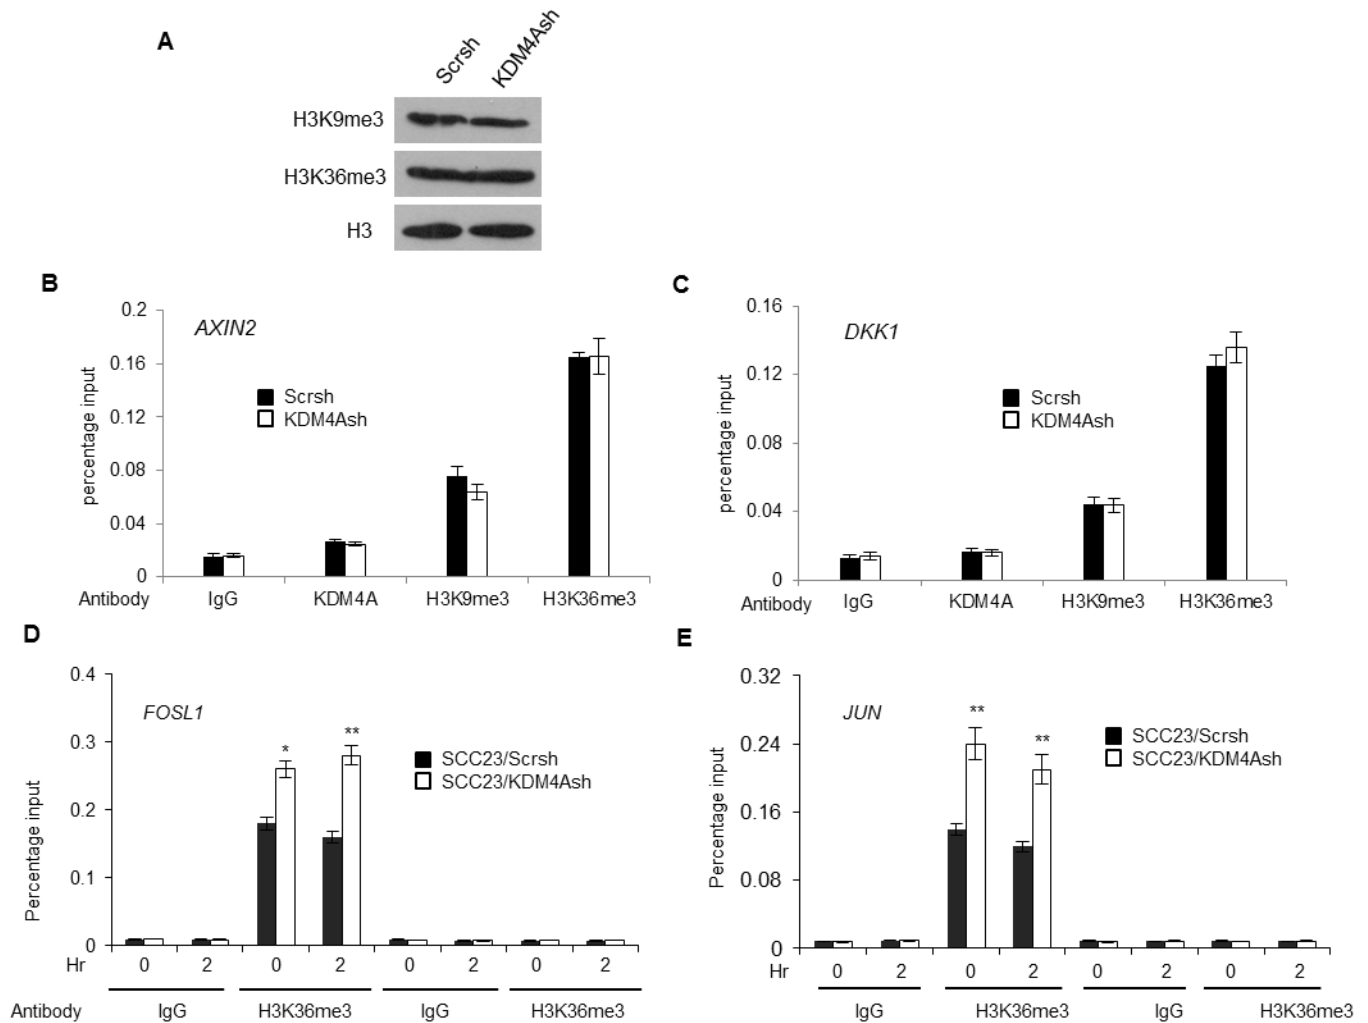

**Fig. S3. KDM4A knockdown does not cause global changes of H3K9me3 and H3K36me3.**

(A) Western blot analysis of H3K9me3 and H3K36me3 marks in KDM4A-depleted cells. Scrsh, SCC23/MET/Scrsh cells; KDM4Ash2, SCC23/MET/KDM4Ash2 cells. Blot is representative of 2 experiments. (B and C) ChIP assays of KDM4A, H3K9me3 and H3K36me3 on the (B) *AXIN2*

or (C) *DKK1* promoter in KDM4A-depleted SCC23/MET cells. (D and E) ChIP assays of H3K36me3 changes on the (D) *FOSL1* or (E) *JUN* promoter in KDM4A-depleted cells, either at the AP-1 site or 8kb upstream. Data in (B to E) are means  $\pm$  s.d. of 3 experiments. \* $P < 0.05$ ; \*\* $P < 0.01$ , unpaired two-tailed Student's *t*-test.

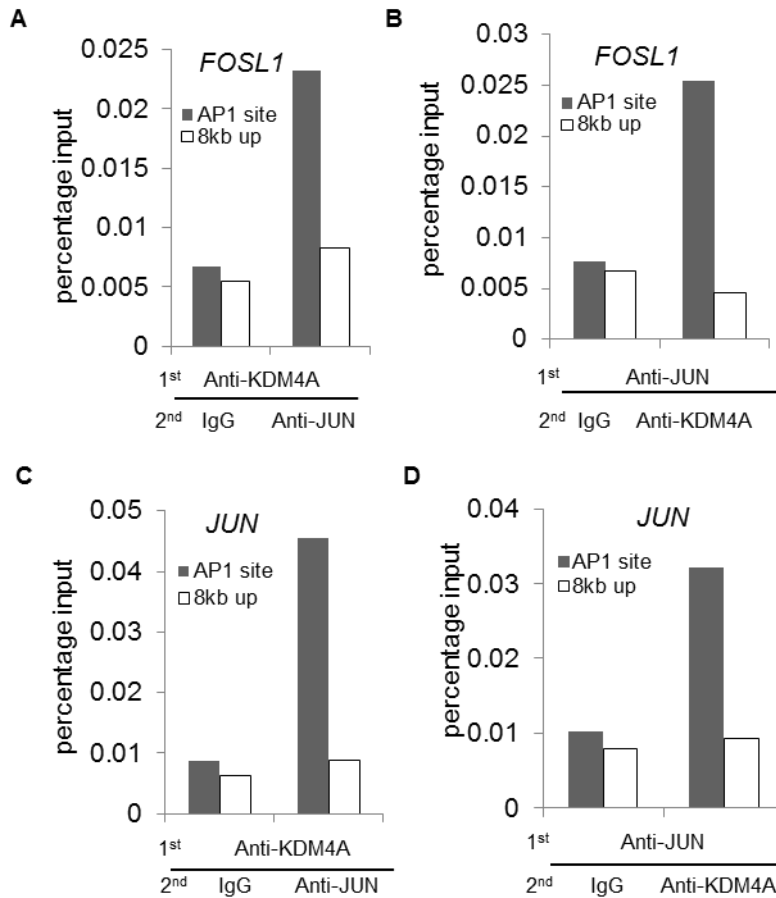

**Fig. S4. JUN and KDM4A co-occupy on the promoters of *FOSL1* and *JUN* in SCC23/MET cells.** (A and B) Reciprocal re-ChIP assays of the co-occupancy of JUN and KDM4A on the *FOSL1* promoter in SCC23/MET cells. The result represents one of three independent experiments. (C and D) The reciprocal re-ChIP assays of the co-occupancy of JUN and KDM4A on the *JUN* promoter in SCC23/MET cells. The data represents one of three independent experiments.

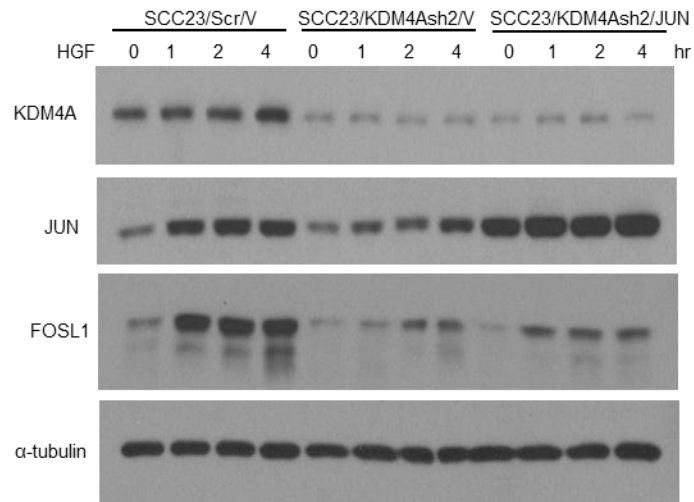

**Fig. S5. Over-expression of JUN cannot restore the abundance of FOSL1 in KDM4A-depleted cells.** Western blot analysis of the abundance of JUN and FOSL1 in SCC23 cells transduced with control shRNA and vector (SCC23/Scr/V), KDM4A-depleted SCC23 cells (SCC23/KDM4Ash2/V), and KDM4A-depleted SCC23 cells overexpressing JUN (SCC23/KDM4Ash2/JUN) treated with 20 ng of HGF per ml for up to 4 hours.

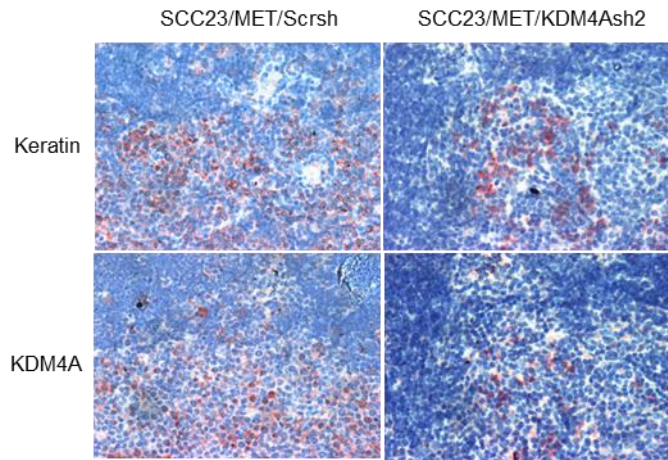

**Fig. S6. Inefficient KDM4A knockdown might be responsible for lymph node metastasis from KDM4A-depleted SCC23/MET cells.** Histological analysis of the abundance of KDM4A in lymph node metastasis from mice with tumor xenografts of either SCC23/MET/Scrsh or SCC23/MET/KDM4Ash2 cells. Cells were stained with antibodies against KDM4A and keratin (red) and counterstained with DAPI (blue).



**Table S1. A list of genes that were repressed by KDM4A knockdown**

Gene expression profiling of SCC23/MET/Scrsh and SCC23/MET/KDM4Ash2 cells was compared.

Genes which had decreased expression by at least two-fold after KDM4A knockdown were listed.

| Probe id     | Gene Symbol | Fold Change |
|--------------|-------------|-------------|
| 201041_s_at  | DUSP1       | 0.09732242  |
| 226682_at    | RORA        | 0.1078467   |
| 242517_at    | KISS1R      | 0.11411252  |
| 209183_s_at  | C10orf10    | 0.11673515  |
| 222847_s_at  | EGLN3       | 0.12201877  |
| 223333_s_at  | ANGPTL4     | 0.12437738  |
| 219232_s_at  | EGLN3       | 0.13060744  |
| 210479_s_at  | RORA        | 0.132921    |
| 221009_s_at  | ANGPTL4     | 0.13939667  |
| 212143_s_at  | IGFBP3      | 0.14458242  |
| 210095_s_at  | IGFBP3      | 0.14884875  |
| 235857_at    | KCTD11      | 0.1560953   |
| 210426_x_at  | RORA        | 0.16137589  |
| 227868_at    | LOC154761   | 0.16940014  |
| 219410_at    | TMEM45A     | 0.18543005  |
| 227337_at    | ANKRD37     | 0.1893493   |
| 202672_s_at  | ATF3        | 0.19179207  |
| 201170_s_at  | BHLHE40     | 0.21027482  |
| 236266_at    | RORA        | 0.21060667  |
| 201044_x_at  | DUSP1       | 0.2147104   |
| 225557_at    | CSRNPI      | 0.22307891  |
| 224797_at    | ARRDC3      | 0.22714761  |
| 202887_s_at  | PPP2R1B     | 0.22764963  |
| 202219_at    | SLC6A8      | 0.23013575  |
| 212099_at    | RHOB        | 0.23181904  |
| 209034_at    | PNRC1       | 0.23414482  |
| 203438_at    | STC2        | 0.23857768  |
| 224657_at    | ERRFI1      | 0.24359527  |
| 215813_s_at  | PTGS1       | 0.24913817  |
| 205969_at    | AADAC       | 0.25156079  |
| 201694_s_at  | EGR1        | 0.25280204  |
| 212188_at    | KCTD12      | 0.25419702  |
| 207574_s_at  | GADD45B     | 0.25696397  |
| 211559_s_at  | CCNG2       | 0.26673629  |
| 203439_s_at  | STC2        | 0.2707417   |
| 221479_s_at  | BNIP3L      | 0.27305434  |
| 227404_s_at  | EGR1        | 0.27428849  |
| 226452_at    | PDK1        | 0.27762666  |
| 210854_x_at  | SLC6A8      | 0.27807308  |
| 204614_at    | SERPINB2    | 0.28218046  |
| 1564027_a_at | FAM115C     | 0.28636737  |
| 202770_s_at  | CCNG2       | 0.29501455  |
| 213843_x_at  | SLC6A8      | 0.29682675  |
| 227697_at    | SOCS3       | 0.29714273  |
| 209305_s_at  | GADD45B     | 0.30295323  |
| 207517_at    | LAMC2       | 0.30511986  |
| 201465_s_at  | JUN         | 0.30732861  |

|              |                                      |            |
|--------------|--------------------------------------|------------|
| 203504_s_at  | ABCA1                                | 0.30854119 |
| 203505_at    | ABCA1                                | 0.31018353 |
| 209822_s_at  | VLDLR                                | 0.31421697 |
| 212110_at    | SLC39A14                             | 0.3164953  |
| 230630_at    | AK3L1                                | 0.31721436 |
| 225342_at    | AK3L1                                | 0.31779889 |
| 211708_s_at  | SCD                                  | 0.31784405 |
| 205476_at    | CCL20                                | 0.31880651 |
| 227038_at    | SGMS2                                | 0.31958088 |
| 200831_s_at  | SCD                                  | 0.32225821 |
| 1554008_at   | OSMR                                 | 0.32327369 |
| 202769_at    | CCNG2                                | 0.32433531 |
| 208893_s_at  | DUSP6                                | 0.3253729  |
| 202364_at    | MXI1                                 | 0.32719033 |
| 205199_at    | CA9                                  | 0.3276951  |
| 223394_at    | SERTAD1                              | 0.32926544 |
| 221478_at    | BNIP3L                               | 0.33253106 |
| 216867_s_at  | PDGFA                                | 0.3339037  |
| 215177_s_at  | ITGA6                                | 0.3347514  |
| 202619_s_at  | PLOD2                                | 0.33617492 |
| 202628_s_at  | SERPINE1                             | 0.33697349 |
| 228846_at    | MXD1                                 | 0.33880146 |
| 205128_x_at  | PTGS1                                | 0.33962063 |
| 201169_s_at  | BHLHE40                              | 0.34033395 |
| 211162_x_at  | SCD                                  | 0.34049441 |
| 204194_at    | BACH1                                | 0.34156499 |
| 201531_at    | ZFP36                                | 0.34171228 |
| 226436_at    | RASSF4                               | 0.3449942  |
| 214446_at    | ELL2                                 | 0.34862671 |
| 219181_at    | LIPG                                 | 0.34906679 |
| 212192_at    | KCTD12                               | 0.35279451 |
| 209457_at    | DUSP5                                | 0.35603624 |
| 201466_s_at  | JUN                                  | 0.3584662  |
| 1554980_a_at | ATF3                                 | 0.3599494  |
| 202627_s_at  | SERPINE1                             | 0.36237366 |
| 238063_at    | TMEM154                              | 0.3624852  |
| 221011_s_at  | LBH                                  | 0.36540544 |
| 227180_at    | ELOVL7                               | 0.36612241 |
| 1569582_at   | LOC201651                            | 0.37136429 |
| 209304_x_at  | GADD45B                              | 0.37280575 |
| 229396_at    | OVOL1                                | 0.37374055 |
| 201294_s_at  | WSB1                                 | 0.3748889  |
| 205281_s_at  | PIGA                                 | 0.37516314 |
| 208892_s_at  | DUSP6                                | 0.3752201  |
| 215812_s_at  | LOC653562 /// SLC6A10P ///<br>SLC6A8 | 0.37583231 |
| 202081_at    | IER2                                 | 0.37605276 |
| 219888_at    | SPAG4                                | 0.37660133 |
| 203108_at    | GPRC5A                               | 0.37750954 |
| 226021_at    | RDH10                                | 0.37941431 |
| 234932_s_at  | CDCP1                                | 0.38056295 |
| 211527_x_at  | VEGFA                                | 0.38416953 |
| 208891_at    | DUSP6                                | 0.38467127 |
| 204036_at    | LPAR1                                | 0.38523054 |
| 222108_at    | AMIGO2                               | 0.38546907 |
| 228149_at    | C7orf60                              | 0.38776755 |
| 212368_at    | ZNF292                               | 0.38781137 |

|              |              |            |
|--------------|--------------|------------|
| 201848_s_at  | BNIP3        | 0.38784524 |
| 209566_at    | INSIG2       | 0.38805606 |
| 201849_at    | BNIP3        | 0.3905754  |
| 210512_s_at  | VEGFA        | 0.39145164 |
| 202441_at    | ERLIN1       | 0.39196697 |
| 203574_at    | NFIL3        | 0.39218058 |
| 227719_at    | SMAD9        | 0.39232631 |
| 202768_at    | FOSB         | 0.39613663 |
| 203705_s_at  | FZD7         | 0.39740943 |
| 202241_at    | TRIB1        | 0.39756151 |
| 220239_at    | KLHL7        | 0.40022911 |
| 219239_s_at  | ZNF654       | 0.40213477 |
| 201626_at    | INSIG1       | 0.40302242 |
| 200920_s_at  | BTG1         | 0.40307522 |
| 226431_at    | FAM117B      | 0.40527947 |
| 225366_at    | PGM2         | 0.4062757  |
| 201464_x_at  | JUN          | 0.40944739 |
| 205227_at    | IL1RAP       | 0.40978185 |
| 204420_at    | FOSL1        | 0.40994919 |
| 204668_at    | RNF24        | 0.41027752 |
| 206686_at    | PDK1         | 0.41044591 |
| 213281_at    | LOC100288387 | 0.41206276 |
| 204669_s_at  | RNF24        | 0.41573468 |
| 227458_at    | CD274        | 0.41801337 |
| 200921_s_at  | BTG1         | 0.41894594 |
| 205266_at    | LIF          | 0.42233538 |
| 211719_x_at  | FN1          | 0.42253478 |
| 224580_at    | SLC38A1      | 0.42574781 |
| 239572_at    | GJA3         | 0.42576964 |
| 213865_at    | DCBLD2       | 0.42577289 |
| 216442_x_at  | FN1          | 0.426884   |
| 225144_at    | BMP2         | 0.42740598 |
| 209596_at    | MXRA5        | 0.42762942 |
| 215446_s_at  | LOX          | 0.42824936 |
| 201631_s_at  | IER3         | 0.43071247 |
| 203987_at    | FZD6         | 0.4322821  |
| 224606_at    | KLF6         | 0.43286078 |
| 212464_s_at  | FN1          | 0.43316242 |
| 224973_at    | FAM46A       | 0.43390376 |
| 201325_s_at  | EMP1         | 0.43499418 |
| 223423_at    | GPR160       | 0.4352783  |
| 202620_s_at  | PLOD2        | 0.43920306 |
| 202444_s_at  | ERLIN1       | 0.43959504 |
| 209185_s_at  | IRS2         | 0.44004989 |
| 229010_at    | CBL          | 0.44019419 |
| 225524_at    | ANTXR2       | 0.44220983 |
| 219496_at    | ANKRD57      | 0.44223221 |
| 202696_at    | OXSRI        | 0.44374722 |
| 203499_at    | EPHA2        | 0.44420052 |
| 212079_s_at  | MLL          | 0.44430892 |
| 202014_at    | PPP1R15A     | 0.44623296 |
| 210495_x_at  | FN1          | 0.44811161 |
| 235216_at    | ESCO1        | 0.44843848 |
| 210139_s_at  | PMP22        | 0.44856066 |
| 207528_s_at  | SLC7A11      | 0.44885084 |
| 1555832_s_at | KLF6         | 0.44956543 |
| 201565_s_at  | ID2          | 0.45040258 |

|              |           |            |
|--------------|-----------|------------|
| 201983_s_at  | EGFR      | 0.4504847  |
| 225946_at    | RASSF8    | 0.45126538 |
| 209212_s_at  | KLF5      | 0.45147844 |
| 212113_at    | ATXN7L3B  | 0.45292152 |
| 203706_s_at  | FZD7      | 0.45293722 |
| 227345_at    | TNFRSF10D | 0.45327453 |
| 208936_x_at  | LGALS8    | 0.45402952 |
| 228328_at    | KLHL28    | 0.45409152 |
| 201627_s_at  | INSIG1    | 0.45581522 |
| 205910_s_at  | CEL       | 0.45656716 |
| 228188_at    | FOSL2     | 0.45712639 |
| 211506_s_at  | IL8       | 0.45734222 |
| 203476_at    | TPBG      | 0.45762888 |
| 203083_at    | THBS2     | 0.457725   |
| 221753_at    | SSH1      | 0.45848708 |
| 202843_at    | NDUFB7    | 0.45861581 |
| 225492_at    | TMEM33    | 0.45915049 |
| 203204_s_at  | KDM4A     | 0.45942046 |
| 223839_s_at  | SCD       | 0.4601726  |
| 226464_at    | C3orf58   | 0.46022556 |
| 200832_s_at  | SCD       | 0.46024597 |
| 219911_s_at  | SLCO4A1   | 0.4628652  |
| 221766_s_at  | FAM46A    | 0.46318903 |
| 201473_at    | JUNB      | 0.46337207 |
| 226863_at    | FAM110C   | 0.46431314 |
| 228498_at    | B4GALT1   | 0.46491665 |
| 226275_at    | MXD1      | 0.46493019 |
| 202131_s_at  | RIOK3     | 0.4650604  |
| 202284_s_at  | CDKN1A    | 0.4651368  |
| 224314_s_at  | EGLN1     | 0.46518484 |
| 232291_at    | MIR17HG   | 0.46529158 |
| 235907_at    | TMEM33    | 0.46635969 |
| 212902_at    | SEC24A    | 0.46674355 |
| 207543_s_at  | P4HA1     | 0.4672333  |
| 201324_at    | EMP1      | 0.4686413  |
| 208961_s_at  | KLF6      | 0.46866469 |
| 205729_at    | OSMR      | 0.46881187 |
| 208078_s_at  | SIK1      | 0.46907971 |
| 1563900_at   | FAM83B    | 0.46917173 |
| 226199_at    | UPRT      | 0.46925662 |
| 228051_at    | KIAA1244  | 0.46954033 |
| 218451_at    | CDCP1     | 0.47012327 |
| 1554462_a_at | DNAJB9    | 0.47153704 |
| 209946_at    | VEGFC     | 0.47164131 |
| 209373_at    | MALL      | 0.47214798 |
| 219326_s_at  | B3GNT2    | 0.47264274 |
| 223092_at    | ANKH      | 0.472998   |
| 219549_s_at  | RTN3      | 0.47373626 |
| 202912_at    | ADM       | 0.47373954 |
| 1555950_a_at | CD55      | 0.47376253 |
| 224888_at    | EPT1      | 0.47402038 |
| 233819_s_at  | RNF160    | 0.47420211 |
| 1557257_at   | BCL10     | 0.47480005 |
| 226982_at    | ELL2      | 0.47535031 |
| 218880_at    | FOSL2     | 0.4767104  |
| 205463_s_at  | PDGFA     | 0.47766133 |
| 201299_s_at  | MOBK1B    | 0.47798889 |

|             |         |            |
|-------------|---------|------------|
| 205220_at   | GPR109B | 0.47844633 |
| 219747_at   | C4orf31 | 0.48005347 |
| 226621_at   | OSMR    | 0.4800904  |
| 223059_s_at | FAM107B | 0.48050722 |
| 231873_at   | BMPR2   | 0.48084873 |
| 227810_at   | ZNF558  | 0.48175181 |
| 222662_at   | PPP1R3B | 0.48188473 |
| 227268_at   | RNFT1   | 0.48226834 |
| 201926_s_at | CD55    | 0.48246661 |
| 213446_s_at | IQGAP1  | 0.48257531 |
| 201996_s_at | SPEN    | 0.48282758 |
| 209920_at   | BMPR2   | 0.48291829 |
| 225262_at   | FOSL2   | 0.4845784  |
| 209101_at   | CTGF    | 0.48473629 |
| 205198_s_at | ATP7A   | 0.48499541 |
| 227467_at   | RDH10   | 0.48597028 |
| 221752_at   | SSH1    | 0.48601037 |
| 217678_at   | SLC7A11 | 0.48705851 |
| 222664_at   | KCTD15  | 0.4879134  |
| 212665_at   | TIPARP  | 0.48809741 |
| 210845_s_at | PLAUR   | 0.48834106 |
| 224675_at   | MESDC2  | 0.48928467 |
| 202067_s_at | LDLR    | 0.49002559 |
| 36711_at    | MAFF    | 0.4903324  |
| 202668_at   | EFNB2   | 0.49216228 |
| 227101_at   | ZNF800  | 0.49275144 |
| 242918_at   | NASP    | 0.49279824 |
| 226899_at   | UNC5B   | 0.49329241 |
| 201883_s_at | B4GALT1 | 0.4943381  |
| 223028_s_at | SNX9    | 0.49464418 |
| 230440_at   | ZNF469  | 0.49514295 |
| 208960_s_at | KLF6    | 0.49529227 |
| 209921_at   | SLC7A11 | 0.49539527 |
| 205865_at   | ARID3A  | 0.49544403 |
| 211165_x_at | EPHB2   | 0.49678276 |
| 206662_at   | GLRX    | 0.49710689 |
| 204029_at   | CELSR2  | 0.49779581 |
| 202842_s_at | FUCA1   | 0.49847394 |
| 201925_s_at | CD55    | 0.49922947 |
| 229115_at   | DYNC1H1 | 0.49956178 |

**Table S2. A list of genes that were more abundantly expressed by KDM4A knockdown**

Gene expression profiling of SCC23/MET/Scrsh and SCC23/MET/KDM4Ash2 cells was compared.

Genes which had increased expression by at least two-fold after KDM4A knockdown were listed.

| Probe id     | Gene Symbol | Fold Change |
|--------------|-------------|-------------|
| 207339_s_at  | LTB         | 3.830801    |
| 222717_at    | SDPR        | 3.800539    |
| 218330_s_at  | NAV2        | 3.581865    |
| 221232_s_at  | ANKRD2      | 3.291787    |
| 204279_at    | PSMB9       | 2.987768    |
| 225355_at    | NEURL1B     | 2.949297    |
| 203153_at    | IFIT1       | 2.84178     |
| 218032_at    | SNN         | 2.750336    |
| 204159_at    | CDKN2C      | 2.75005     |
| 239710_at    | FIGN        | 2.653337    |
| 241994_at    | XDH         | 2.611372    |
| 1555812_a_at | ARHGDIB     | 2.589005    |
| 1555310_a_at | PAK6        | 2.579088    |
| 227420_at    | TNFAIP8L1   | 2.555685    |
| 205083_at    | AOX1        | 2.514485    |
| 206504_at    | CYP24A1     | 2.499747    |
| 225817_at    | CGNL1       | 2.431342    |
| 1555758_a_at | CDKN3       | 2.411858    |
| 229579_s_at  | DISP2       | 2.40829     |
| 230720_at    | RNF182      | 2.407355    |
| 206632_s_at  | APOBEC3B    | 2.398149    |
| 238964_at    | FIGN        | 2.388475    |
| 224480_s_at  | AGPAT9      | 2.381937    |
| 229450_at    | IFIT3       | 2.367701    |
| 205547_s_at  | TAGLN       | 2.356659    |
| 218755_at    | KIF20A      | 2.354288    |
| 242828_at    | FIGN        | 2.352474    |
| 201288_at    | ARHGDIB     | 2.348331    |
| 202270_at    | GBP1        | 2.343887    |
| 213201_s_at  | TNNT1       | 2.328715    |
| 219461_at    | PAK6        | 2.324283    |
| 238989_at    | C1GALT1C1   | 2.307249    |
| 1555724_s_at | TAGLN       | 2.289264    |
| 238756_at    | GAS2L3      | 2.279381    |
| 219493_at    | SHCBP1      | 2.257145    |
| 209714_s_at  | CDKN3       | 2.246927    |
| 221436_s_at  | CDCA3       | 2.223754    |
| 227609_at    | EPSTI1      | 2.223709    |
| 202954_at    | UBE2C       | 2.218814    |
| 214858_at    | PP14571     | 2.217766    |
| 202609_at    | EPS8        | 2.2041      |
| 223707_at    | RPL27A      | 2.200567    |
| 242470_at    | EID2B       | 2.199034    |
| 228885_at    | MAMDC2      | 2.182855    |
| 227687_at    | HYLS1       | 2.174374    |
| 222016_s_at  | ZNF323      | 2.168375    |
| 203562_at    | FEZ1        | 2.166705    |
| 201896_s_at  | PSRC1       | 2.12653     |
| 200783_s_at  | STMN1       | 2.124477    |

|             |          |          |
|-------------|----------|----------|
| 202283_at   | SERPINF1 | 2.108871 |
| 204962_s_at | CENPA    | 2.107512 |
| 205225_at   | ESR1     | 2.09808  |
| 228933_at   | NHS      | 2.091451 |
| 219716_at   | APOL6    | 2.090762 |
| 203390_s_at | KIF3C    | 2.078011 |
| 213906_at   | MYBL1    | 2.076351 |
| 210538_s_at | BIRC3    | 2.073879 |
| 203638_s_at | FGFR2    | 2.070224 |
| 203018_s_at | SSX2IP   | 2.064685 |
| 223307_at   | CDCA3    | 2.036918 |
| 218033_s_at | SNN      | 2.032911 |
| 213929_at   | EXPH5    | 2.030645 |
| 228729_at   | CCNB1    | 2.017431 |
| 209172_s_at | CENPF    | 2.012435 |
| 201058_s_at | MYL9     | 2.010891 |
| 229068_at   | CCT5     | 2.010091 |
| 232197_x_at | ARSB     | 2.002876 |

**Table S3. Real-time RT-PCR primers for human histone demethylases**

| Gene Name | Forward Primers (5' – 3')    | Reversed Primers (5' – 3') |
|-----------|------------------------------|----------------------------|
| KDM4A     | CCTCACTGCGCTGTCTGTAT         | CCAGTCGAAGTGAAGCACAT       |
| KDM4B     | CGGGTTCTATCTTTGTTTCTCTCACCCG | AAGGAAGCCTCTGGAACACCTG     |
| KDM4C     | GGCATAGGTGACAGGGTGTGTC       | CGGGGACCAAACCTCTGGAAACCCG  |
| KDM4D     | CGGGATCTGCACAGATTATCCACCCG   | AGTTTCTGAGGAGGGCGACCA      |
| KDM5A     | GTTTCTTAAGGTGGCAAGTC         | TCTTTTGTACTGTTCCCTAC       |
| KDM5B     | AGCTTTCTCAGAATGTTGGC         | GCAGAGTCTGGGAATTCACA       |
| KDM5C     | GGGTTTCTAAAGTGTAGATCT        | CCACACATCTGAGCTTTAGT       |
| KDM3A     | ACCTGCAGTTATTCTTCAGC         | TAATGCCAGTCCTATGCCAT       |
| KDM3B     | TGTTCCCTGGGGACTCCTCT         | GGGCACTACAGTACAGCTGG       |
| JMJD1C    | TTTGTTGAAGCTATTGACTG         | CACTTTAACAAAAGCAAGCC       |
| KDM2A     | CGGATAGTTGAGAAAGCCAAGATCCG   | CTCTTTGGTGGGCCTCTGTAGC     |
| KDM2B     | GTTAGTGGTAGTGGTGTGTTTGG      | AGCAGATGTGGTGTGTGGTC       |
| KDM6A     | CGTCCGAGTGTCAACCAACTGGACG    | TGAGAGTCCTGGAGTAGGAGCAG    |
| KDM6B     | CTCAACTTGGGCCTCTTCTC         | GCCTGTCAGATCCCAGTTCT       |
| PHF2      | TCGGCACTTCTCTGTTCTCCC        | AAATCCAGCCCCTCCGTGTC       |
| PTH8      | CTTTCTCTACCTTGGGGACC         | TAGGGACTCACGTGCTAGGG       |
| JMJD4     | GGCCCTTCCAGAAATAAAGACC       | CAGGCAGTGGCCATGAACAG       |
| JMJD5     | GTGGGGAGAGCCCAGAAGGACATT     | GACCCACCCGTTTCCCAAAA       |
| HR        | AGACCTCTGCCCTCTCTGCT         | GCTTGGAACACAGCCCAGTC       |
| FIH1AN    | TTACTTAACCTCTCTGAGCC         | CCAACAACCCTGAGGTAGAT       |
| HSPBAP1   | ACGTAGAAGCTACACTCGAAG        | TAAGCCCAGAACTTGAATG        |
| JARID2    | AAGTGCTGCTTACATCACTG         | AGTGGATCATAGGACGTTCC       |
| PTDSR     | AGGTGGATCACTTGAGGTCA         | CACCACACCTGGCTAATTTT       |
| JMJD7     | GCCCAGGCCACACATAATTT         | AGTGGTAGCTTTCCATGTGG       |
| JHDM1D    | ATCTGTGAACCTTTGGAGAGG        | TAGGGACTCACGTGCTAGGG       |
